# Supplementary material for: Spatial and temporal variations in plant water-use efficiency inferred from tree-ring, eddy covariance and atmospheric observations
Source: Copernicus journal article supplement (doi:10.5194/esd-7-525-2016), 2016-06-28
Supplement: Supplementary file 1 [file esd-7-525-2016-supplement.zip]

# **Spatial and temporal variations in plant Water Use Efficiency inferred from tree-ring, eddy covariance and atmospheric observations**

Stefan C. Dekker<sup>1\*</sup>, Margriet Groenendijk<sup>2\*</sup>, Ben B. B. Booth<sup>3</sup>, Chris Huntingford<sup>4</sup> and Peter M. Cox<sup>2</sup>

\* Joint lead-authors

<sup>1</sup> *Copernicus Institute of Sustainable Development, Faculty of Geosciences, Utrecht University, Heidelberglaan 2, 3584 CS Utrecht, the Netherlands*

<sup>2</sup> *College of Engineering, Mathematics and Physical Sciences, University of Exeter, North Park Road, Exeter, EX4 4QF, UK*

<sup>3</sup> *Met Office Hadley Centre, FitzRoy Road, Exeter, EX1 3PB, UK*

<sup>4</sup> *Centre for Ecology and Hydrology, Benson Lane, Wallingford, OXON, OX10 8BB, UK*

## **Supporting Information**

## Section 1: Comparison to stomatal optimization theories

**Katul et al (1)** give the following expression for  $f$  (their Equation 15):

$$f = 1 - \sqrt{\frac{1.6 \lambda D}{c_a}} \quad (\text{S1})$$

where in general the Katul et al. theory assumes that  $\lambda$  depends on  $C_a$ . Substituting equation S1 into our Equation (2) for  $WUE$  gives the following expression:

$$WUE = \sqrt{\frac{\lambda c_a}{1.6 D}} \quad (\text{S2})$$

In the linear approximation to the Katul et al. theory, Palmroth et al. (2) state that  $\lambda$  is directly proportional to  $C_a$ , such that:

$$WUE = k \frac{c_a}{\sqrt{D}} \quad (\text{S3})$$

where  $k$  is a constant.

**Medlyn et al. (3)** give the following expression for the  $WUE$  (their Equation 14):

$$WUE = \frac{c_a}{g_1 \sqrt{D} + D} \quad (\text{S4})$$

where  $g_1$  is a constant. In general  $g_1$  values are much larger than  $\sqrt{D}$ , so that:

$$WUE \approx \frac{c_a}{g_1 \sqrt{D}} \quad (\text{S5})$$

To derive effective  $a$  and  $b$  coefficients for each of these forms of  $WUE$  are calculated as:

$$a = \frac{\partial WUE}{\partial c_a} \frac{c_a}{WUE} \quad (\text{S6})$$

$$b = \frac{\partial WUE}{\partial D} \frac{D}{WUE} \quad (\text{S7})$$

from which we find that  $[a, b] = [1, -0.5]$  for both the models of Palmroth et al. (2) and Medlyn et al. (3).

## Section 2: Partitioning the fractional change in humidity deficit a change in temperature and relative humidity

$$D = q_{sat}(1 - RH) \quad (S8)$$

$$\Delta D = \frac{\partial q_{sat}}{\partial T} (1 - RH) \Delta T - q_{sat} \Delta RH \quad (S9)$$

$$\frac{\Delta D}{D} = \frac{1}{q_{sat}} \frac{\partial q_{sat}}{\partial T} \Delta T - \frac{\Delta RH}{(1 - RH)} \approx 0.07 \Delta T - \frac{\Delta RH}{(1 - RH)} \quad (S10)$$

Strictly  $\Delta T$  in this equation is the surface (skin) temperature, but this is well approximated by the change in near surface air temperature, which is available from the global CRU dataset.

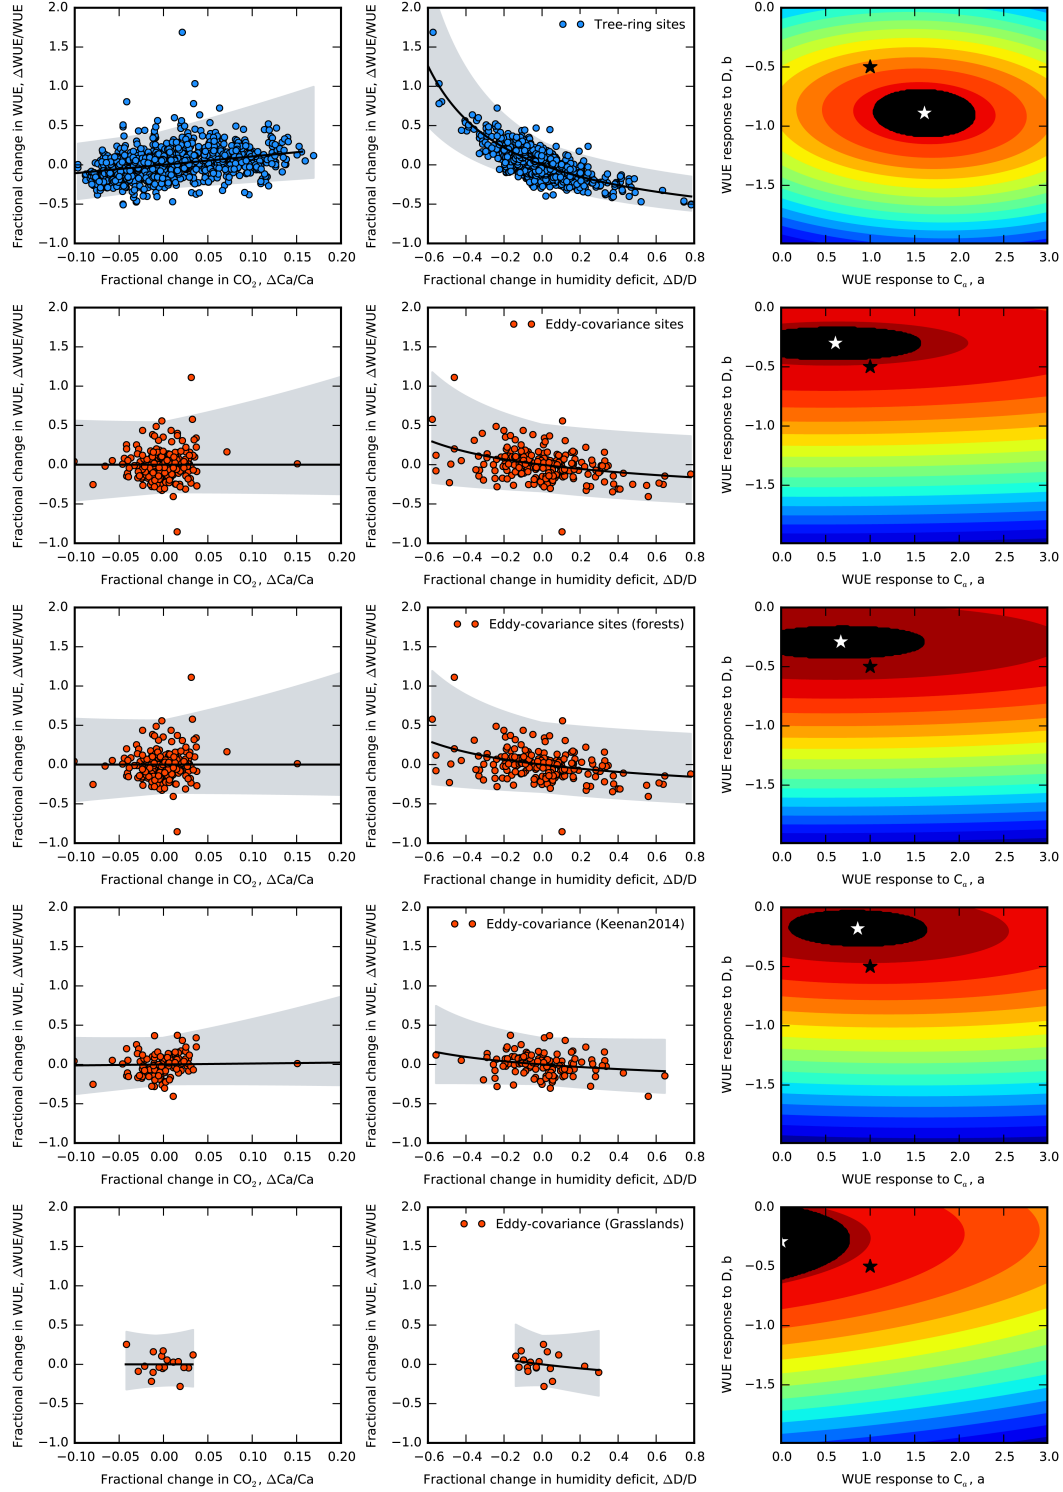

**Fig. S1.** Water Use Efficiency ( $WUE$ ) from tree-ring and eddy-covariance observations as Fig. 1, but for different groups of sites. See also Table S3 for the values of  $a$  and  $b$  for each group.

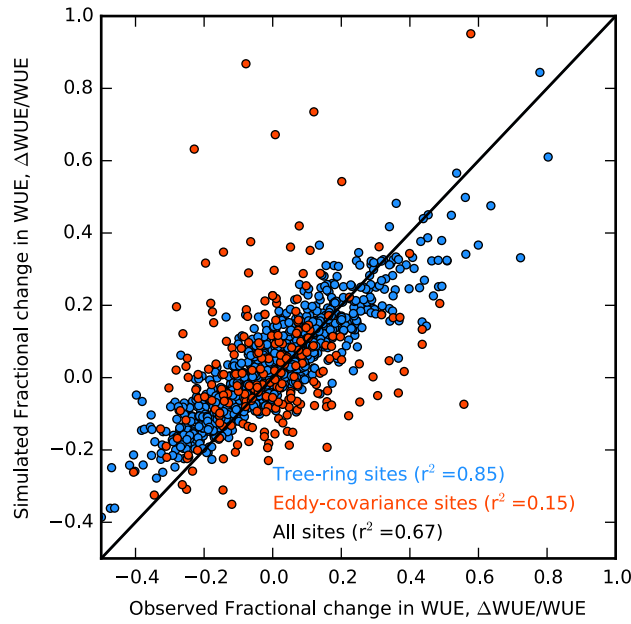

**Fig. S2.** Comparison of simulated and observed fractional change in  $WUE$  for the tree-ring and eddy-covariance sites.

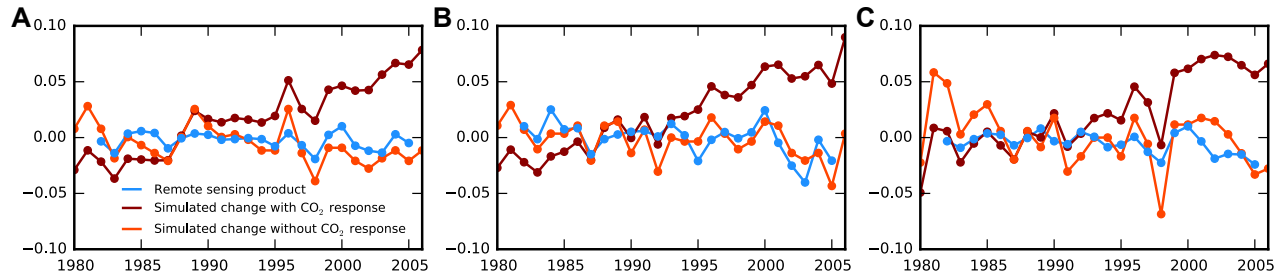

**Fig. S3.** Comparison of the (Andreu-Hayles et al., 2011; Arneth et al., 2002; Hemming et al., 1998) estimated fractional change in  $WUE$  with a remote sensing product for 3 different regions: (A) the Amazon, (B) South Africa and (C) South East Asia.

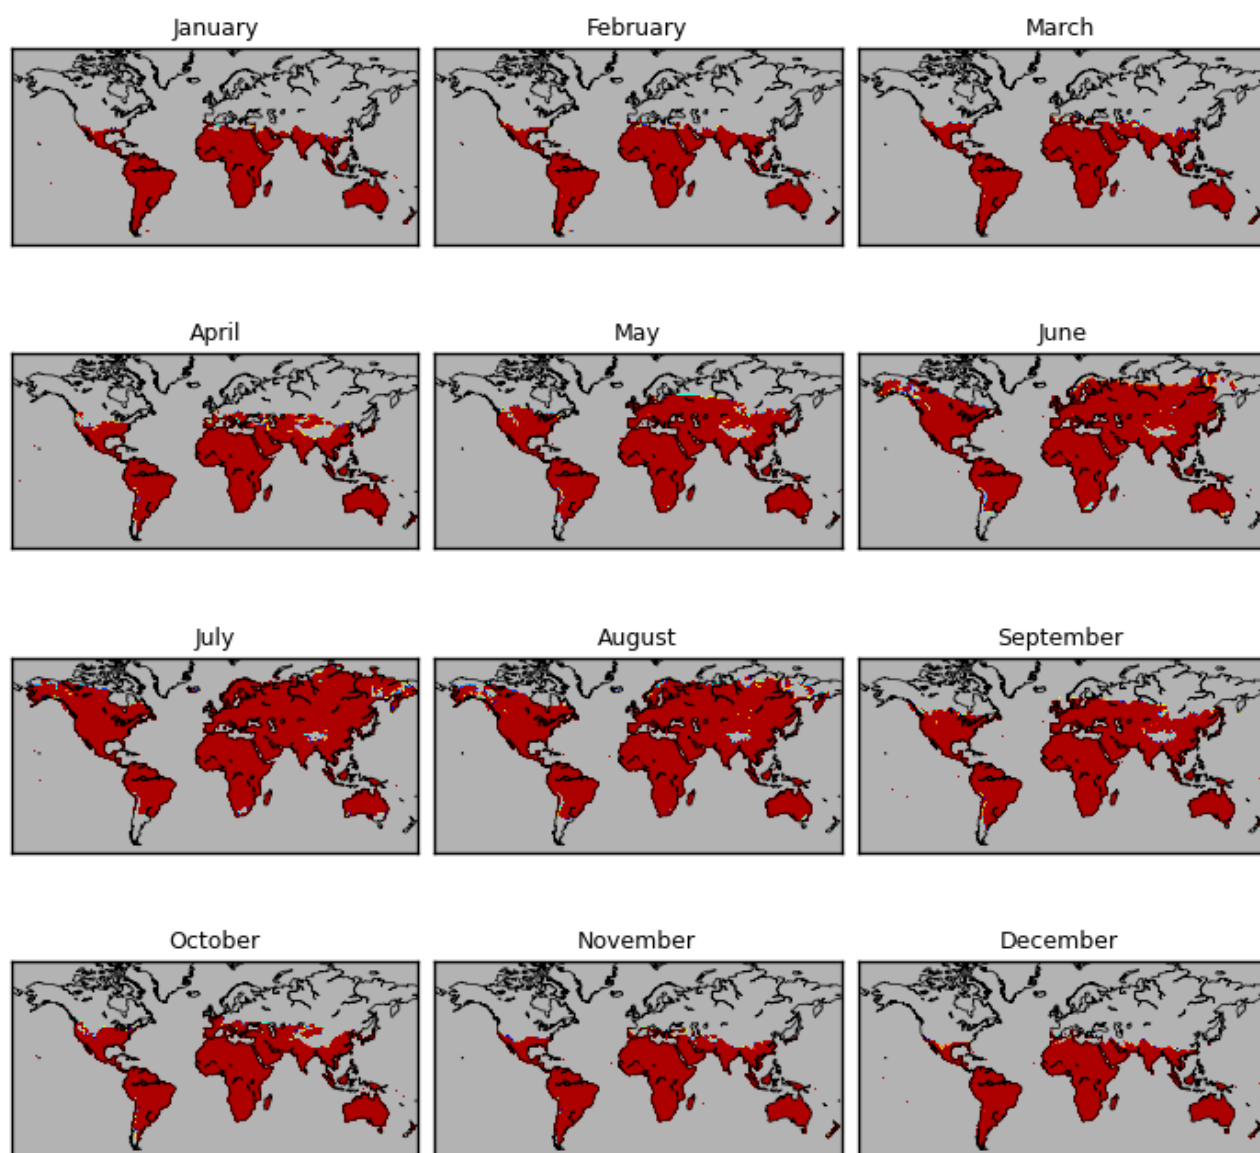

**Fig S4.** Monthly mask of the area included in the growing season. For each month the average temperature (1900-1930) from the CRU TS3.20 dataset was used to determine which areas were included in the growing season based on a 10°C threshold.

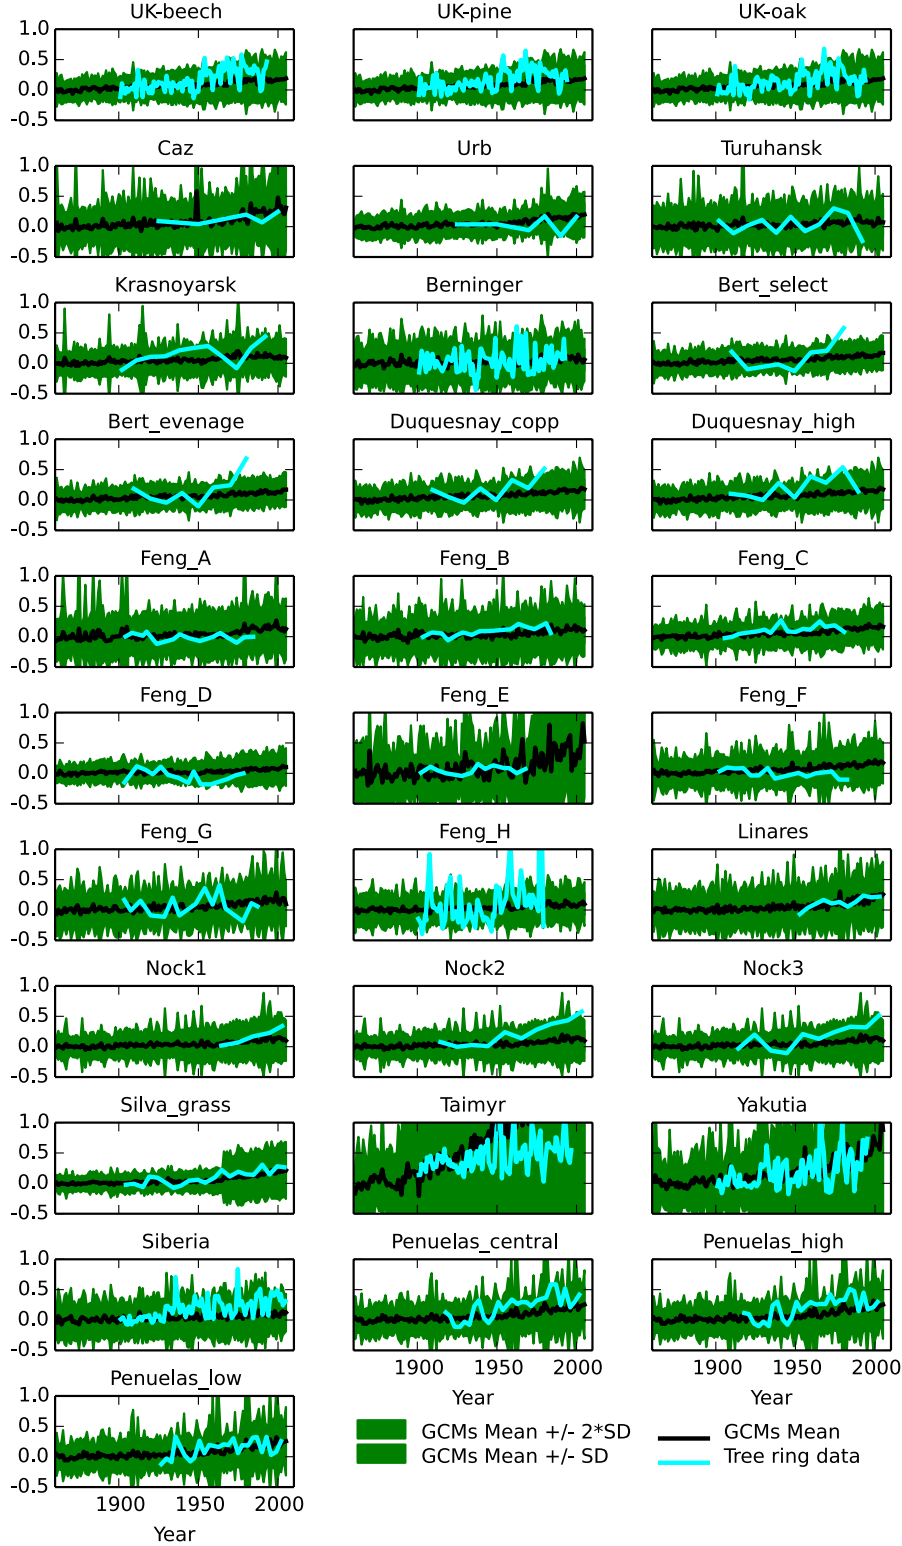

**Fig. S5:** Site by site comparisons of fractional WUE between the average regional ESMs climate projections and the tree ring data of the 31 site observations. Locations and details of the site observations can be found in table S2.

**Table S1.** Summary of the Fluxnet sites selected from the *Free Fair-use* dataset (www.fluxdata.org). The sites are selected based on data availability as described in the main text.  $n$  is the number of growing seasons with data available above the threshold of 10°C,  $a$  and  $b$  are the fitted parameter values from Equation (3) and  $r^2$  is the coefficient of determination for this fit. Vegetation types are deciduous broadleaf forest (DBF), evergreen broadleaf forest (EBF), evergreen needleleaf forest (ENF), grassland (GRA), mixed forest (MF), wetland (WET) and woody savannah (WSA).

| Site   | Vegetation | Latitude | Longitude | $a \pm \sigma$ | $b \pm \sigma$ | $n$ | $r^2$ |
|--------|------------|----------|-----------|----------------|----------------|-----|-------|
| AU-How | WSA        | -12.49   | 131.15    | -4.70±2.20     | -2.86±1.25     | 6   | 0.63  |
| BE-Bra | MF         | 51.31    | 4.52      | -2.57±2.65     | -0.76±0.23     | 6   | 0.77  |
| BE-Vie | MF         | 50.31    | 6         | 0.01±0.51      | -0.18±0.11     | 10  | 0.29  |
| CZ-BK1 | ENF        | 49.5     | 18.54     | -10.27±6.80    | -0.45±0.27     | 7   | 0.49  |
| DE-Tha | ENF        | 50.96    | 13.57     | 0.68±1.79      | -0.19±0.13     | 9   | 0.26  |
| DK-Sor | DBF        | 55.49    | 11.65     | 0.81±0.69      | 0.34±0.40      | 10  | 0.20  |
| ES-ES1 | ENF        | 39.35    | -0.32     | 1.24±0.74      | -0.81±0.21     | 8   | 0.74  |
| FI-Hyy | ENF        | 61.85    | 24.29     | -0.25±1.47     | -0.59±0.27     | 10  | 0.38  |
| FI-Kaa | WET        | 69.14    | 27.3      | 4.38±5.52      | -0.58±0.27     | 7   | 0.53  |
| FR-Hes | DBF        | 48.67    | 7.06      | 1.69±2.56      | -0.02±0.30     | 10  | 0.06  |
| FR-LBr | ENF        | 44.72    | -0.77     | 7.28±3.04      | -0.10±0.25     | 8   | 0.51  |
| FR-Pue | EBF        | 43.74    | 3.6       | 2.60±2.67      | 0.48±0.26      | 7   | 0.41  |
| IL-Yat | ENF        | 31.35    | 35.05     | -7.20±10.60    | -1.00±1.29     | 6   | 0.16  |
| IT-Col | DBF        | 41.85    | 13.59     | -1.13±3.41     | 0.20±0.28      | 10  | 0.06  |
| IT-Cpz | EBF        | 41.71    | 12.38     | 0.16±2.31      | -0.48±0.13     | 8   | 0.79  |
| IT-Ren | ENF        | 46.59    | 11.43     | -10.39±4.30    | 0.12±0.26      | 8   | 0.65  |
| IT-Ro1 | DBF        | 42.41    | 11.93     | 4.00±5.59      | -0.40±0.26     | 7   | 0.35  |
| IT-SRo | ENF        | 43.73    | 10.28     | 7.90±1.53      | -0.33±0.10     | 8   | 0.88  |
| NL-Loo | ENF        | 52.17    | 5.74      | -0.65±2.13     | 0.18±0.31      | 10  | 0.04  |
| RU-Fyo | ENF        | 56.46    | 32.92     | -0.45±1.89     | -0.03±0.14     | 9   | 0.01  |
| SE-Nor | ENF        | 60.09    | 17.48     | -11.36±4.90    | -0.84±0.30     | 6   | 0.75  |
| UK-Gri | ENF        | 56.61    | -3.8      | -2.35±8.69     | -1.10±0.94     | 6   | 0.42  |
| US-Blo | ENF        | 38.9     | -120.63   | 2.01±3.88      | -1.21±0.82     | 10  | 0.29  |
| US-Ha1 | DBF        | 42.54    | -72.17    | 2.81±3.07      | 0.46±0.26      | 7   | 0.46  |
| US-Ho1 | ENF        | 45.2     | -68.74    | 3.88±1.87      | 0.10±0.17      | 9   | 0.38  |
| US-Ton | WSA        | 38.43    | -120.97   | -3.42±3.58     | -0.36±0.32     | 6   | 0.27  |
| US-Var | GRA        | 38.41    | -120.95   | 0.32±3.84      | -0.28±0.67     | 6   | 0.05  |
| US-WCr | DBF        | 45.81    | -90.08    | 3.44±2.56      | -0.44±0.21     | 8   | 0.49  |



**Table S2.** Summary of the tree-ring sites used in this study.  $n$  is the number of years with data available,  $a$  and  $b$  are the fitted parameter values from Equation (3) and  $r^2$  is the coefficient of determination for this fit.

| Site                 | Species                       | Lat    | Lon     | n   | $a \pm \sigma$ | $b \pm \sigma$ | $r^2$ | Reference                   |
|----------------------|-------------------------------|--------|---------|-----|----------------|----------------|-------|-----------------------------|
| Woburn Abbey - beech | <i>Fagus silvatica</i>        | 52.23  | -0.46   | 93  | 2.34±0.18      | -0.71±0.06     | 0.86  | Hemming et al. (1998)       |
| Woburn Abbey - pine  | <i>Pinus sylvestris</i>       | 52.23  | -0.46   | 94  | 1.56±0.18      | -0.73±0.06     | 0.79  | Hemming et al. (1998)       |
| Woburn Abbey - oak   | <i>Quercus robur</i>          | 52.23  | -0.46   | 94  | 1.76±0.17      | -0.70±0.06     | 0.81  | Hemming et al. (1998)       |
| Caz                  | <i>Pinus nigra</i>            | 37.80  | 2.95    | 6   | 1.16±0.08      | -1.08±0.09     | 0.98  | Andreu-Hayles et al. (2011) |
| Urb                  | <i>Pinus uncinata</i>         | 42.23  | 1.70    | 6   | 0.78±0.38      | -1.03±0.23     | 0.84  | Andreu-Hayles et al. (2011) |
| Turuhansk            | <i>Pinus sylvestris</i>       | 65.80  | 87.90   | 11  | 0.66±0.43      | -1.40±0.25     | 0.79  | Arneth et al. (2002)        |
| Krasnoyarsk          | <i>Pinus sylvestris</i>       | 56.00  | 92.90   | 11  | 1.71±0.33      | -0.99±0.16     | 0.87  | Arneth et al. (2002)        |
| Berninger            | <i>Pinus sylvestris</i>       | 68.46  | 25.93   | 74  | 0.84±0.12      | -0.90±0.03     | 0.97  | Berninger et al. (2000)     |
| Bert select          | <i>Abies alba</i>             | 46.52  | 6.02    | 8   | 2.06±0.51      | -0.94±0.15     | 0.98  | Bert et al. (1997)          |
| Bert evenage         | <i>Abies alba</i>             | 46.52  | 6.02    | 8   | 2.05±0.42      | -1.02±0.13     | 0.98  | Bert et al. (1997)          |
| Duquesnay copp       | <i>Fagus silvatica</i>        | 49.00  | 6.00    | 8   | 0.92±0.44      | -0.96±0.15     | 0.95  | Duquesnay et al. (1998)     |
| Duquesnay_high       | <i>Fagus silvatica</i>        | 49.00  | 6.00    | 9   | 1.16±0.23      | -0.90±0.09     | 0.97  | Duquesnay et al. (1998)     |
| Feng_A               | <i>Pinus edulis</i>           | 37.43  | -112.47 | 15  | 0.40±0.15      | -0.86±0.11     | 0.84  | Feng (1999)                 |
| Feng_B               | <i>Pinus edulis</i>           | 37.50  | -108.33 | 16  | 1.33±0.17      | -0.91±0.17     | 0.83  | Feng (1999)                 |
| Feng_C               | <i>Pinus longaeva</i>         | 37.53  | -118.22 | 16  | 0.93±0.14      | -1.04±0.11     | 0.91  | Feng (1999)                 |
| Feng_D               | <i>Fitzroya cupresoides</i>   | -40.05 | -74.13  | 14  | 0.97±0.15      | -0.92±0.05     | 0.98  | Feng (1999)                 |
| Feng_E               | <i>Juniperus phoenicea</i>    | 30.67  | 34.00   | 13  | 0.91±0.18      | -0.89±0.10     | 0.88  | Feng (1999)                 |
| Feng_F               | <i>Pinus ponderosa</i>        | 35.92  | -121.37 | 14  | 0.16±0.33      | -0.68±0.17     | 0.74  | Feng (1999)                 |
| Feng_G               | <i>Quercus lobata</i>         | 34.15  | 118.73  | 15  | 0.54±0.31      | -0.97±0.10     | 0.89  | Feng (1999)                 |
| Feng_H               | <i>Picea sitchensis</i>       | 57.92  | -152.60 | 60  | 0.34±0.52      | -0.94±0.06     | 0.98  | Feng (1999)                 |
| Linares              | <i>Abies pinsapo</i>          | 36.69  | -5.02   | 11  | 1.35±0.09      | -1.05±0.09     | 0.98  | Linares et al. (2009)       |
| Nock1                | <i>Melia</i>                  | 15.67  | 99.17   | 5   | 1.91±0.17      | -0.45±0.24     | 0.99  | Nock et al. (2011)          |
| Nock2                | <i>Toona</i>                  | 15.67  | 99.17   | 10  | 2.22±0.18      | -0.78±0.21     | 0.96  | Nock et al. (2011)          |
| Nock3                | <i>Chukrasia</i>              | 15.67  | 99.17   | 10  | 2.02±0.19      | -1.16±0.15     | 0.97  | Nock et al. (2011)          |
| Silva_grass          | <i>Araucaria angustifolia</i> | -28.59 | -48.82  | 21  | 1.12±0.09      | -0.99±0.12     | 0.93  | Silva et al. (2010)         |
| Taimyr               | <i>Larix gmelinii</i>         | 70.63  | 103.20  | 102 | 1.46±0.13      | -1.00±0.05     | 0.86  | Sidorova et al. (2010)      |
| Yakutia              | <i>Larix gmelinii</i>         | 70.00  | 148.00  | 78  | 2.48±0.31      | -1.01±0.09     | 0.74  | Sidorova et al. (2010)      |
| Siberia              | <i>Larix gmelinii</i>         | 64.53  | 100.23  | 102 | 1.82±0.05      | -1.00±0.03     | 0.97  | Sidorova et al. (2009)      |
| Penuelas_central     | <i>Fagus sylvatica</i>        | 41.77  | 2.43    | 29  | 2.29±0.19      | -1.01±0.10     | 0.91  | Penuelas et al. (2008)      |
| Penuelas_high        | <i>Fagus sylvatica</i>        | 41.77  | 2.43    | 29  | 1.77±0.18      | -1.07±0.10     | 0.89  | Penuelas et al. (2008)      |
| Penuelas_low         | <i>Fagus sylvatica</i>        | 41.77  | 2.43    | 25  | 0.94±0.15      | -0.97±0.08     | 0.90  | Penuelas et al. (2008)      |

**Table S3.** Comparison of  $a$  and  $b$  values from Equations 3 and 4 between tree-ring and eddy-covariance sites from Tables S2 and S3. The values of the combined datasets are compared to the values of the tree-ring or eddy-covariance sites only. The range is derived from the black areas in Fig. S2.

| Description                  | $a$             | $b$              |
|------------------------------|-----------------|------------------|
| Tree-rings + Eddy-covariance | $1.51 \pm 0.57$ | $-0.72 \pm 0.16$ |
| Tree-rings                   | $1.61 \pm 0.54$ | $-0.89 \pm 0.17$ |
| Eddy-covariance              | $0.79 \pm 0.79$ | $-0.30 \pm 0.10$ |
| Eddy-covariance (Keenan)     | $1.46 \pm 0.78$ | $-0.19 \pm 0.10$ |
| Eddy-covariance (Forests)    | $0.90 \pm 0.90$ | $-0.29 \pm 0.10$ |
| Eddy-covariance (Grasslands) | $0.00 \pm 0.00$ | $-0.29 \pm 0.29$ |

**Table S4.** Comparison of the quality of the fits to observed  $WUE$  changes at *Fluxnet* sites, using varying numbers of environmental predictor variables. Our default model (equation 6) which uses just atmospheric  $CO_2$  concentration ( $C_a$ ) and atmospheric humidity deficit ( $D$ ), is given by the first row of the table. The additional environmental predictors used are those readily available from a significant number ( $n$ ) of *Fluxnet* sites: solar radiation at the surface ( $R_g$ ), air temperature ( $T_a$ ), and soil water content ( $SWC$ ). The adjusted  $r^2$  value accounts for the increase in the basic  $r^2$  measure that is to be expected when additional parameters are introduced into a statistical model. Models with larger adjusted- $r^2$  values are therefore considered more robust, as they avoid over-fitting of the data.

| Predictor Variables     | $n$ | $a$   | $b$    | $r^2$ | Adjusted $r^2$ |
|-------------------------|-----|-------|--------|-------|----------------|
| $C_a, D$                | 227 | 1.028 | -0.290 | 0.103 | 0.096          |
| $C_a, D, R_g$           | 227 | 1.056 | -0.309 | 0.105 | 0.093          |
| $C_a, D, R_g, T_a$      | 227 | 1.124 | -0.331 | 0.108 | 0.092          |
| $C_a, D, R_g, T_a, SWC$ | 124 | 0.532 | -0.416 | 0.118 | 0.081          |

**Table S5.** Fractional change in WUE simulated in the historical simulations of CMIP5 Earth System Models (ESMs). These are for research centres and models where both transpiration (“tran”) and Gross Primary Productivity (“gpp”) monthly variables are available, with ensemble size given in the 3<sup>rd</sup> column. The year 2005 normalised change (4<sup>th</sup> column) is relative to the mean over the modelled period from 1860 to 1890.

| <b>Research Centre</b> | <b>Climate Model</b> | <b>Ensemble size</b> | <b>Fractional change in WUE by 2005</b> |
|------------------------|----------------------|----------------------|-----------------------------------------|
| BCC                    | bcc-csm1-1           | 3                    | 0.19                                    |
| BCC                    | bcc-csm1-1-m         | 1                    | 0.21                                    |
| BNU                    | BNU-ESM              | 1                    | 0.20                                    |
| CCCma                  | CanESM2              | 5                    | 0.10                                    |
| CMCC                   | CMCC-CESM            | 1                    | 0.02                                    |
| INM                    | inmcm4               | 1                    | 0.07                                    |
| IPSL                   | IPSL-CM5A-LR         | 6                    | 0.15                                    |
| IPSL                   | IPSL-CM5A-MR         | 3                    | 0.14                                    |
| IPSL                   | IPSL-CM5B-LR         | 1                    | 0.16                                    |
| MIROC                  | MIROC-ESM            | 3                    | 0.03                                    |
| MIROC                  | MIROC-ESM-CHEM       | 1                    | 0.03                                    |
| MPI-M                  | MPI-ESM-LR           | 3                    | 0.24                                    |
| MPI-M                  | MPI-ESM-MR           | 3                    | 0.21                                    |
| MPI-M                  | MPI-ESM-P            | 2                    | 0.21                                    |
| MRI                    | MRI-ESM1             | 1                    | 0.28                                    |
| NASA-GISS              | GISS-E2-H            | 8                    | 0.13                                    |
| NASA-GISS              | GISS-E2-H-CC         | 1                    | 0.16                                    |
| NASA-GISS              | GISS-E2-R            | 20                   | 0.13                                    |
| NASA-GISS              | GISS-E2-R-CC         | 1                    | 0.11                                    |
| NCAR                   | CCSM4                | 8                    | 0.12                                    |
| NCC                    | NorESM1-M            | 3                    | 0.10                                    |
| NCC                    | NorESM1-ME           | 1                    | 0.10                                    |
| NOAA-GFDL              | GFDL-ESM2G           | 1                    | 0.20                                    |
| NOAA-GFDL              | GFDL-ESM2M           | 1                    | 0.19                                    |
| NSF-DOE-NCAR           | CESM1-BGC            | 1                    | 0.12                                    |
| NSF-DOE-NCAR           | CESM1-CAM5           | 3                    | 0.17                                    |
| NSF-DOE-NCAR           | CESM1-FASTCHEM       | 3                    | 0.12                                    |
| NSF-DOE-NCAR           | CESM1-WACCM          | 1                    | 0.13                                    |
| <b>Ensemble Mean</b>   |                      |                      | <b>0.14</b>                             |

## References in Supplementary Information

- Andreu-Hayles, L., Planells, O., Guti rrez, E., Muntan, E., Helle, G., Anchukaitis, K.J., Schleser, G.H., 2011. Long tree-ring chronologies reveal 20th century increases in water-use efficiency but no enhancement of tree growth at five Iberian pine forests. *Glob. Chang. Biol.* 17, 2095–2112. doi:10.1111/j.1365-2486.2010.02373.x
- Arneth, a, Arneth, a, Lloyd, J., Lloyd, J., Bird, M., Bird, M., Grigoryev, S., Grigoryev, S., Kalaschnikov, N., Kalaschnikov, N., Gleixner, G., Gleixner, G., Schulze, D., Schulze, D., 2002. Response of central Siberian Scots pine to soil water deficit and long-term trends in atmospheric CO<sub>2</sub> concentration 16.
- Berninger, F., Sonninen, E., Aalto, T., Lloyd, J., 2000. Modeling <sup>13</sup>C Discrimination in Tree Rings 14, 213–223.
- Bert, D., Leavitt, S., Dupouey, J.L., 1997. *Abies Alba* During the Last Century. *Ecology* 78, 1588–1596.
- Duquesnay, A, Breda, N., Stievenard, M., Dupouey, J.L., 1998. Changes of tree-ring delta C-13 and water-use efficiency of beech (*Fagus sylvatica* L.) in north-eastern France during the past century. *Plant Cell Environ.* 21, 565–572. doi:10.1046/j.1365-3040.1998.00304.x
- Feng, X., 1999. Trends in intrinsic water-use efficiency of natural trees for the past 100-200 years: A response to atmospheric CO<sub>2</sub> concentration. *Geochim. Cosmochim. Acta* 63, 1891–1903. doi:10.1016/S0016-7037(99)00088-5
- Hemming, D.L., Switsur, V.R., Waterhouse, J.S., Heaton, T.H.E., Carter, a H.C., 1998. Climate variation and the stable carbon isotope composition of tree ring cellulose: an intercomparison of *Quercus robur*, *Fagus sylvatica* and *Pinus silvestris*. *Tellus Ser. B-Chemical Phys. Meteorol.* 50, 25–33. doi:10.1034/j.1600-0889.1998.00002.x
- Katul, G., Manzoni, S., Palmroth, S., Oren, R., 2010. A stomatal optimization theory to describe the effects of atmospheric CO<sub>2</sub> on leaf photosynthesis and transpiration. *Ann. Bot.* 105, 431–442. doi:10.1093/aob/mcp292
- Linares, J.C., Delgado-Huertas, A., Camarero, J.J., Merino, J., Carreira, J.A., 2009. Competition and drought limit the response of water-use efficiency to rising atmospheric carbon dioxide in the Mediterranean fir *Abies pinsapo*. *Oecologia* 161, 611–624. doi:10.1007/s00442-009-1409-7
- Medlyn, B.E., Duursma, R.A., Eamus, D., Ellsworth, D.S., Prentice, I.C., Barton, C.V.M., Crous, K.Y., De Angelis, P., Freeman, M., Wingate, L., 2011. Reconciling the optimal and empirical approaches to modelling stomatal conductance. *Glob. Chang. Biol.* 17, 2134–2144. doi:10.1111/j.1365-2486.2010.02375.x
- Nock, C.A., Baker, P.J., Wanek, W., Leis, A., Grabner, M., Bunyavejchewin, S., Hietz, P., 2011. Long-term increases in intrinsic water-use efficiency do not lead to increased stem growth in a tropical monsoon forest in western Thailand. *Glob. Chang. Biol.* 17, 1049–1063. doi:10.1111/j.1365-2486.2010.02222.x
- Palmroth, S., Katul, G.G., Maier, C.A., Ward, E., Manzoni, S., Vico, G., 2013. On the complementary relationship between marginal nitrogen and water-use efficiencies among *Pinus taeda* leaves grown under ambient and CO<sub>2</sub>-enriched environments. *Ann. Bot.* 111, 467–477. doi:10.1093/aob/mcs268
- Pe uelas, J., Hunt, J.M., Ogaya, R., Jump, A.S., 2008. Twentieth century changes of tree-ring  $\delta^{13}\text{C}$  at the southern range-edge of *Fagus sylvatica*: Increasing water-use efficiency does not

avoid the growth decline induced by warming at low altitudes. *Glob. Chang. Biol.* 14, 1076–1088. doi:10.1111/j.1365-2486.2008.01563.x

Sidorova, O. V., Siegwolf, R.T.W., Saurer, M., Naurzbaev, M.M., Shashkin, A. V., Vaganov, E.A., 2010. Spatial patterns of climatic changes in the Eurasian north reflected in Siberian larch tree-ring parameters and stable isotopes. *Glob. Chang. Biol.* 16, 1003–1018. doi:10.1111/j.1365-2486.2009.02008.x

Sidorova, O.V., Siegwolf, R.T.W., Saurer, M., Shashkin, A. V., Knorre, A.A., Prokushkin, A.S., Vaganov, E.A., Kirdyanov, A. V., 2009. Do centennial tree-ring and stable isotope trends of *Larix gmelinii* (Rupr.) Rupr. indicate increasing water shortage in the Siberian north? *Oecologia* 161, 825–835. doi:10.1007/s00442-009-1411-0

Silva, L.C.R., Anand, M., Leithead, M.D., 2010. Recent widespread tree growth decline despite increasing atmospheric CO<sub>2</sub>. *PLoS One* 5. doi:10.1371/journal.pone.0011543
