# Supplementary material for: Spatial and temporal variations in plant water-use efficiency inferred from tree-ring, eddy covariance and atmospheric observations
Source: Copernicus journal article supplement (doi:10.5194/esd-7-525-2016), 2016-06-28
Supplement: Supplementary file 3 [file esd-7-525-2016-supplement.zip]

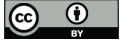

## *Supplement of*

# **Spatial and temporal variations in plant water-use efficiency inferred from tree-ring, eddy covariance and atmospheric observations**

**Stefan C. Dekker et al.**

*Correspondence to:* Stefan C. Dekker ([s.c.dekker@uu.nl](mailto:s.c.dekker@uu.nl))

- esd-7-525-2016-supplement-title-page.pdf
- Dekker\_ESD2016\_SI.pdf
- WUEanimation.avi
- \_\_MACOSX
  - .\_Dekker\_ESD2016\_SI.pdf
  - .\_WUEanimation.avi

The copyright of individual parts of the supplement might differ from the CC-BY 3.0 licence.
